# Supplementary material for: Selective and highly efficient synthesis of xanthenedione or tetraketone derivatives catalyzed by ZnO nanorod-decorated graphene oxide
Source: Royal Society of Chemistry journal article supplement (doi:10.1039/c8nj01053f), 2018-01-01
Supplement: c8nj01053f1.pdf [file c8nj01053f1.pdf]

**Selective and highly efficient synthesis of xanthenedione or tetraketone derivatives catalyzed by ZnO nanorods decorated graphene oxide**

Sepideh Hasanzadeh Banakar, Mohammad G. Dekamin\* and Amene Yaghoubi

**Contents:**

|                                                                                                                                 |    |
|---------------------------------------------------------------------------------------------------------------------------------|----|
| FT-IR spectra of the GO sheets (down), GO/ZnO nanocomposite (up).....                                                           | 2  |
| Energy dispersive spectroscopy (EDX) pattern of GO/ZnO (1).....                                                                 | 3  |
| Field emission scanning electron microscopy (FESEM) images of GO (a) and GO/ZnO nanocomposite (1) (b).....                      | 3  |
| X-Ray diffraction pattern of GO and GO/ZnO and ZnO particles.....                                                               | 4  |
| Thermal gravimetric analysis of the GO/ZnO nanocomposite and recycled GO/ZnO nanocomposite.....                                 | 4  |
| Reusability of GO/ZnO for the synthesis of 4a and 5a.....                                                                       | 5  |
| FT-IR spectra of fresh GO/ZnO nanocomposite and recycled GO/ZnO nanocomposite .....                                             | 5  |
| IR Spectrum of 2,2'-((4-chlorophenyl)methylene)bis(3-hydroxy-5,5-dimethylcyclohex-2-en-1-one) (4a).....                         | 6  |
| <sup>1</sup> H NMR Spectrum of 2,2'-((4-chlorophenyl)methylene)bis(3-hydroxy-5,5-dimethylcyclohex-2-en-1-one) (4a).....         | 7  |
| IR Spectrum of 9-(4-chlorophenyl)-3,3,6,6-tetramethyl-3,4,5,6,7,9-hexahydro-1H-xanthene-1,8(2H)-dione (5a).....                 | 8  |
| <sup>1</sup> H NMR spectrum of 9-(4-chlorophenyl)-3,3,6,6-tetramethyl-3,4,5,6,7,9-hexahydro-1H-xanthene-1,8(2H)-dione (5a)..... | 9  |
| IR Spectrum of 3,3,6,6-tetramethyl-9-(p-tolyl)-3,4,5,6,7,9-hexahydro-1H-xanthene-1,8(2H)-dione (5j).....                        | 10 |
| <sup>1</sup> H NMR Spectrum of 3,3,6,6-tetramethyl-9-(p-tolyl)-3,4,5,6,7,9-hexahydro-1H-xanthene-1,8(2H)-dione (5j).....        | 11 |

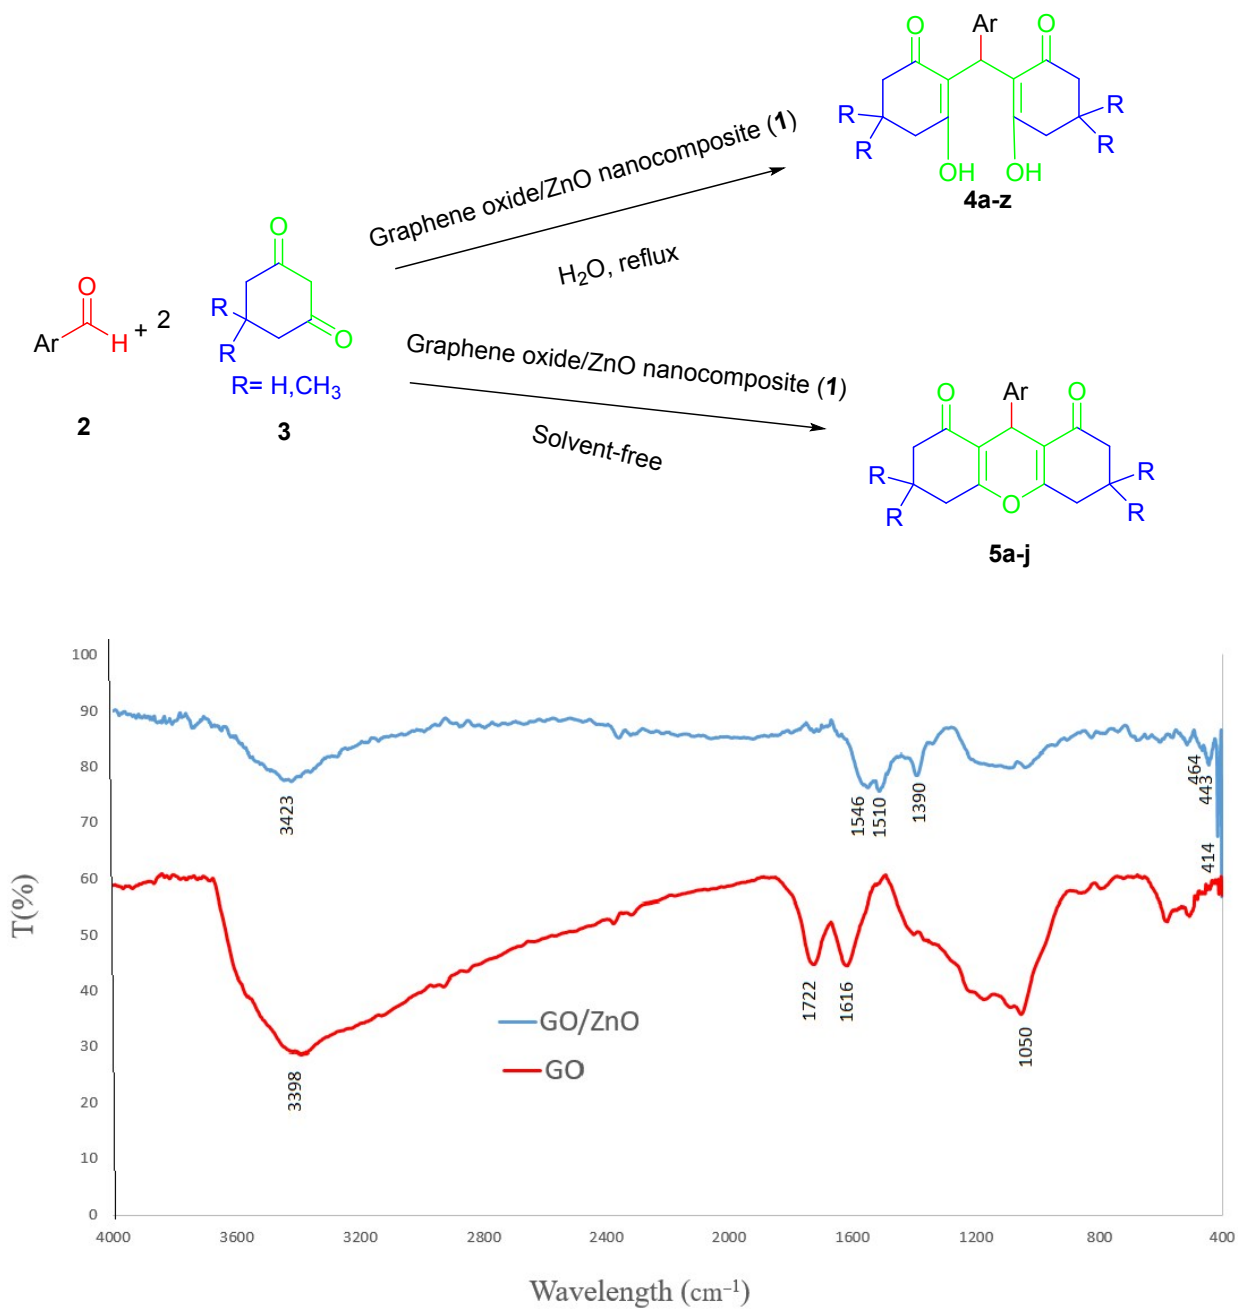

**Fig. 1** FTIR spectra of the graphene oxide (GO) sheets (down) and ZnO decorated graphene oxide (GO/ZnO) nanocomposite (1, up).

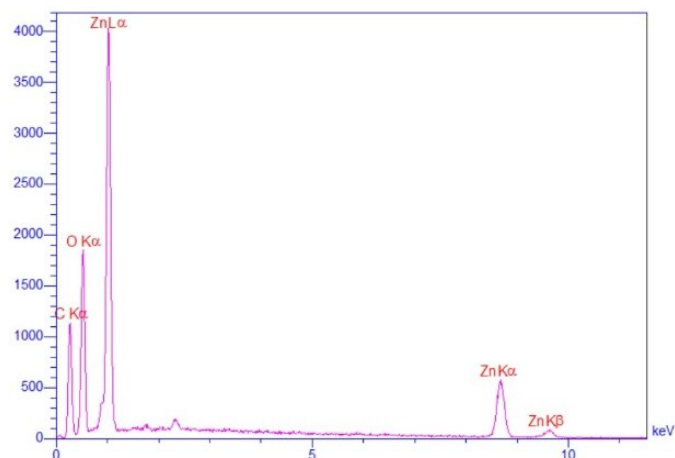

**Fig. 2** Energy dispersive spectroscopy (EDX) pattern of the ZnO decorated graphene oxide (GO/ZnO) nanocomposite (1).

(a)

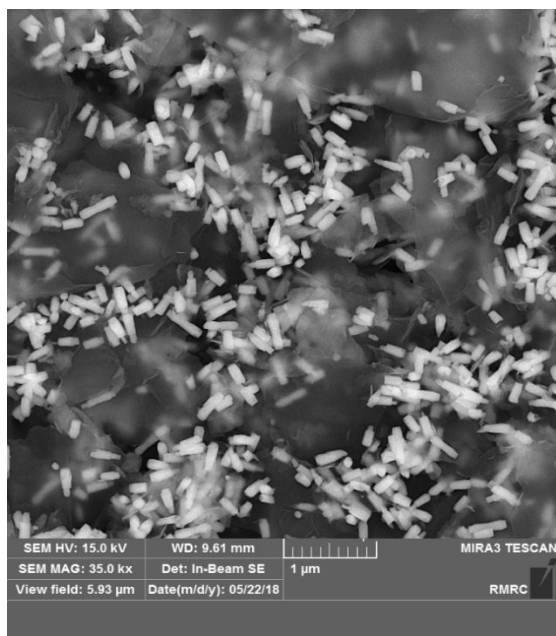

(b)

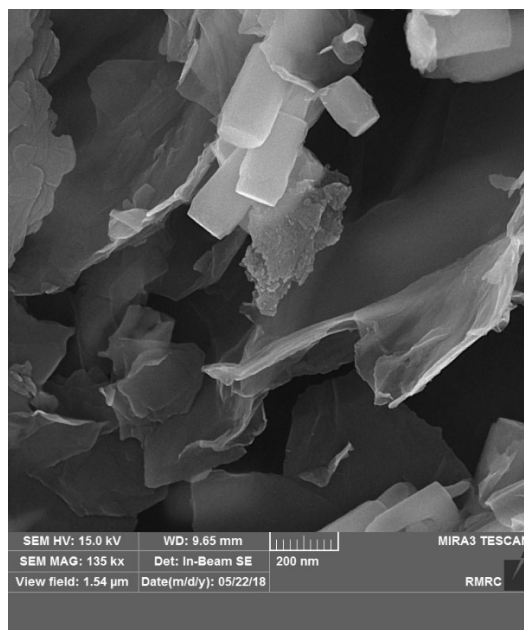

**Fig. 3** Field emission scanning electron microscopy (FESEM) of the ZnO nanorods-decorated graphene oxide (GO/ZnO) nanocomposite (a, b).

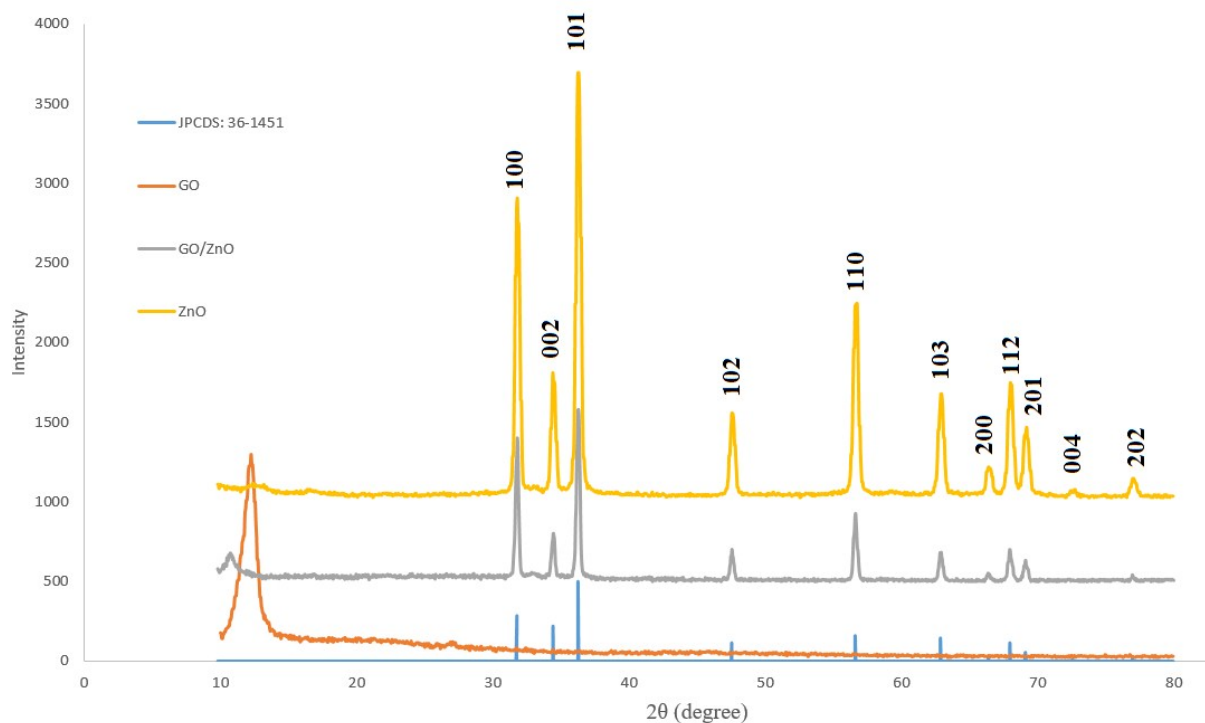

**Fig. 4** X-Ray diffraction (XRD) pattern of the GO, ZnO nanorods-decorated graphene oxide (GO/ZnO) nanocomposite (**1, b**), ZnO nanoparticles and the hexagonal phase of ZnO (JPCDS 36-1451).

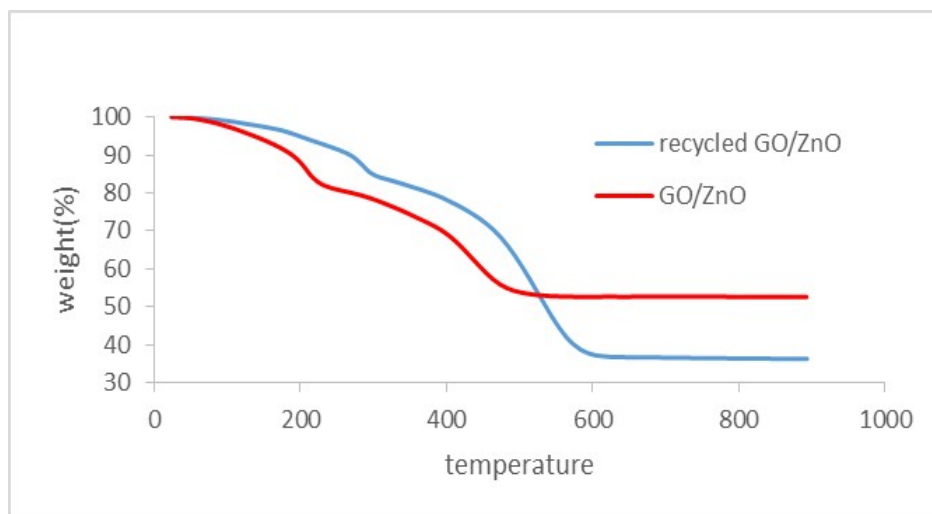

**Fig. 5** Thermal gravimetric analysis of the GO/ZnO nanocomposite and recycled GO/ZnO nanocomposite.

## NEW JOURNAL OF CHEMISTRY

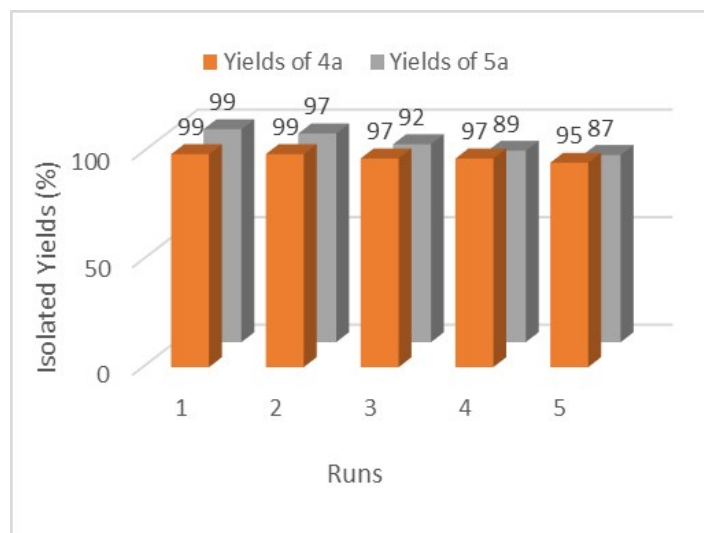

**Fig. 6** Reusability of the GO/ZnO nanocomposite (**1**) for the synthesis of **4a** and **5a**.

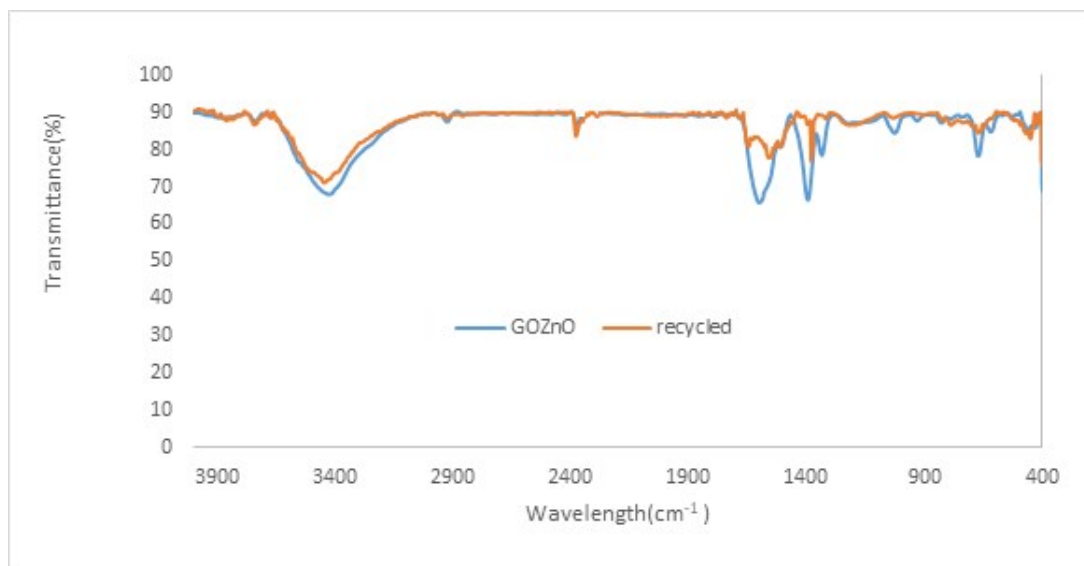

**Fig. 7.** FTIR spectra of fresh and recycled GO/ZnO nanocomposite (**1**).

**Selected spectral data:****2,2'-((4-chlorophenyl)methylene)bis(3-hydroxy-5,5-dimethylcyclohex-2-en-1-one) (4a)**

White solid; m.p. 145 °C (recrystallized from EtOH); IR  $\tilde{\nu}$ : 3396-1976, 1778, 1724, 1608, 1377, 1242, 1062, 1012, 910, 810-920, 661, 582, 543, 497  $\text{cm}^{-1}$ ;  $^1\text{H}$  NMR (500 MHz,  $\text{CDCl}_3$ )  $\delta$  (ppm): 11.87 (1H, s, OH), 7.23-7.025 (2H, d,  $J=12$  Hz, ArH), 7.02-6.99 (2H, d,  $J=8$  Hz, ArH), 5.46 (1H, s, CH), 2.47-2.29 (8H, m,  $\text{CH}_2$ ), 1.21 (6H, s,  $\text{CH}_3$ ), 1.09 (6H, s,  $\text{CH}_3$ ).

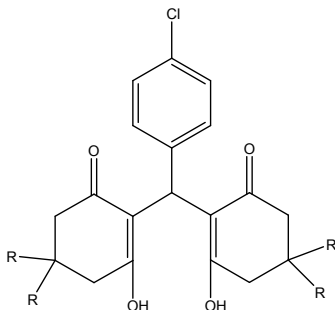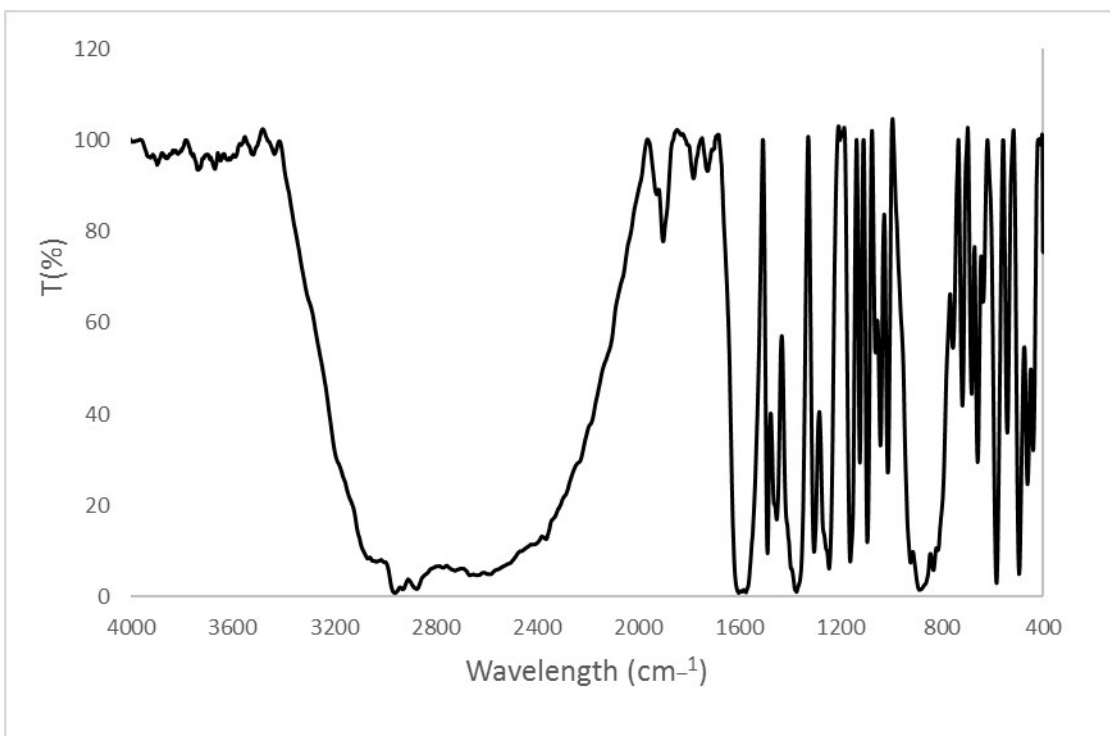

**Fig. 8** IR spectrum of 2,2'-((4-chlorophenyl)methylene)bis(3-hydroxy-5,5-dimethylcyclohex-2-en-1-one) (4a).

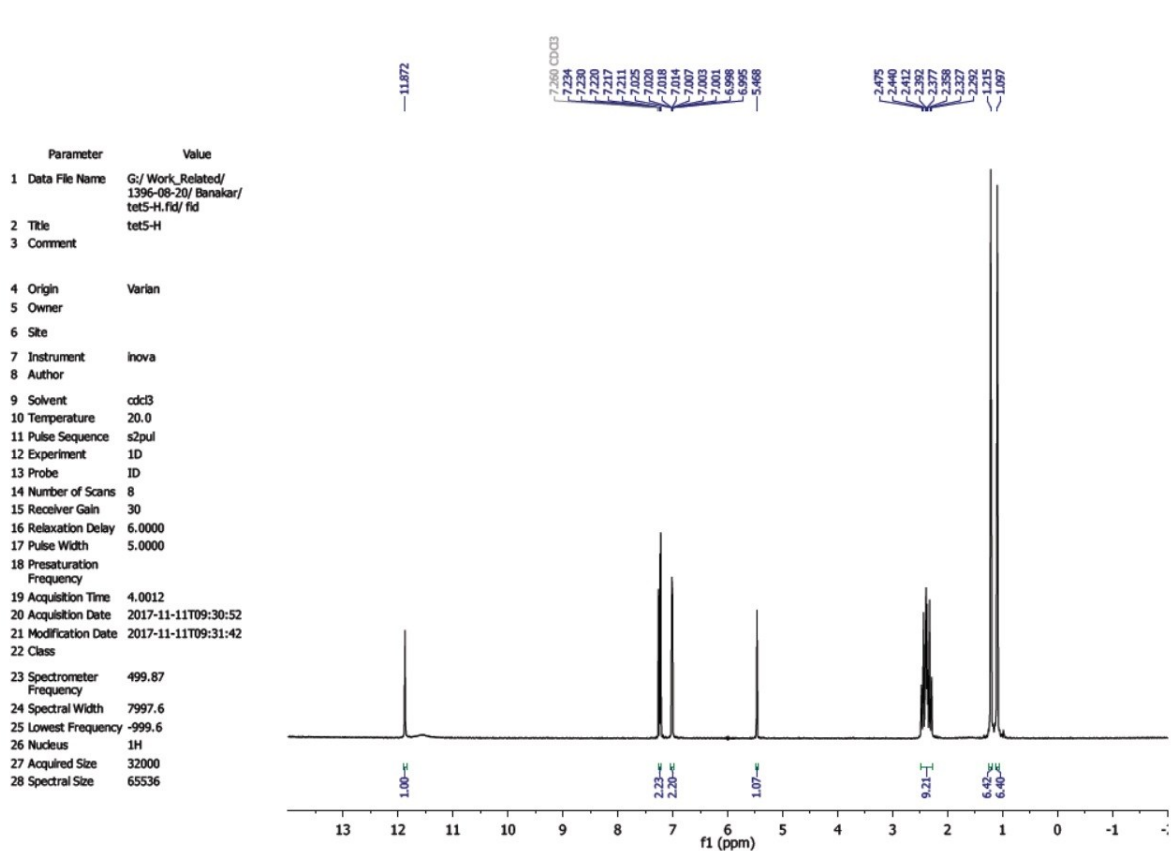

**Fig. 9** <sup>1</sup>H NMR spectrum of 2,2'-((4-chlorophenyl)methylene)bis(3-hydroxy-5,5-dimethylcyclohex-2-en-1-one) (**4a**).

**9-(4-chlorophenyl)-3,3,6,6-tetramethyl-3,4,5,6,7,9-hexahydro-1H-xanthene-1,8(2H)-dione (5a)**

White solid; m.p. 231-233°C (recrystallized from EtOH); IR  $\tilde{\nu}$ : 2956, 1660, 1465, 1359, 1193, 1160, 1139, 1004, 845, 662, 603, 561, 528  $\text{cm}^{-1}$ ;  $^1\text{H NMR}$  (500 MHz,  $\text{CDCl}_3$ )  $\delta$  (ppm): 7.22 (2H, d,  $J=8$  Hz, ArH), 7.16 (2H, d,  $J=8$  Hz, ArH), 4.7 (1H, s, CH), 2.49-2.42 (4H, s,  $\text{CH}_2$ ), 2.24-2.14 (4H, m,  $\text{CH}_2$ ), 1.09 (6H, s,  $\text{CH}_3$ ), 0.98 (6H, s,  $\text{CH}_3$ ).

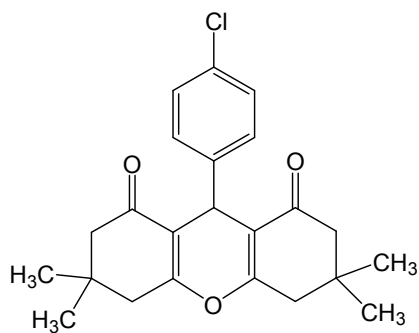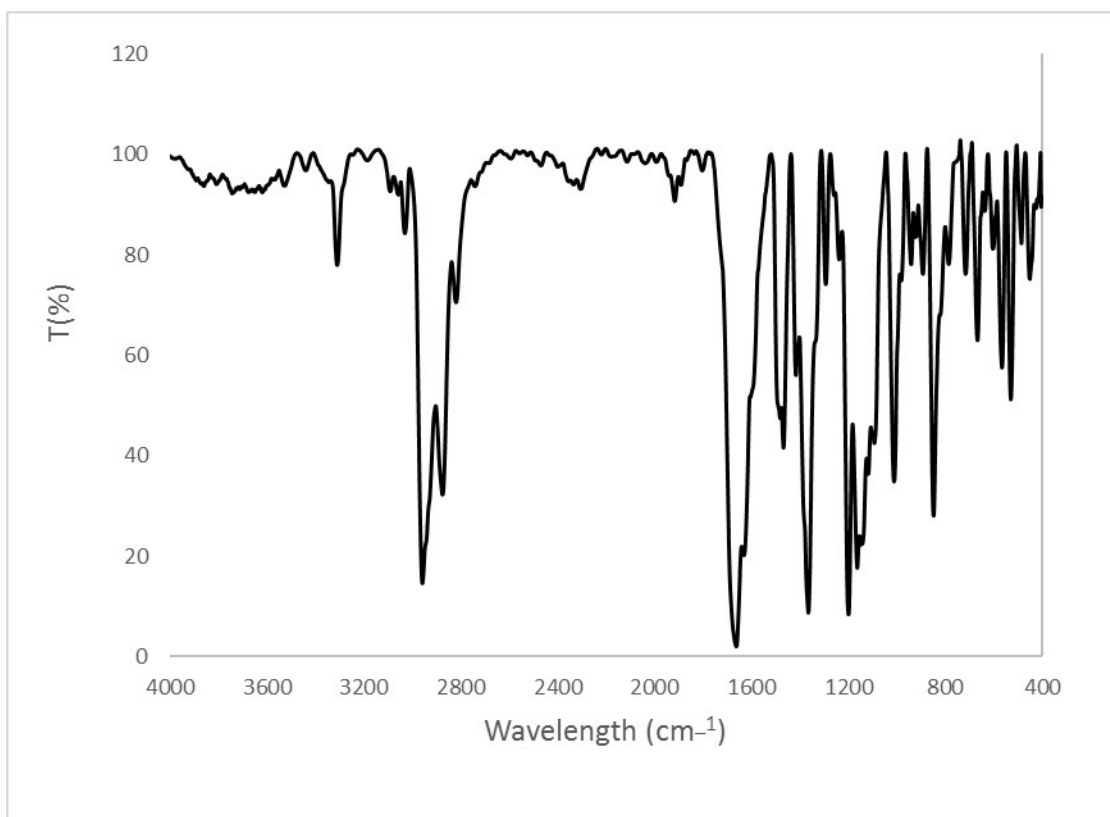

**Fig. 10** IR Spectrum of 9-(4-chlorophenyl)-3,3,6,6-tetramethyl-3,4,5,6,7,9-hexahydro-1H-xanthene-1,8(2H)-dione (**5a**).



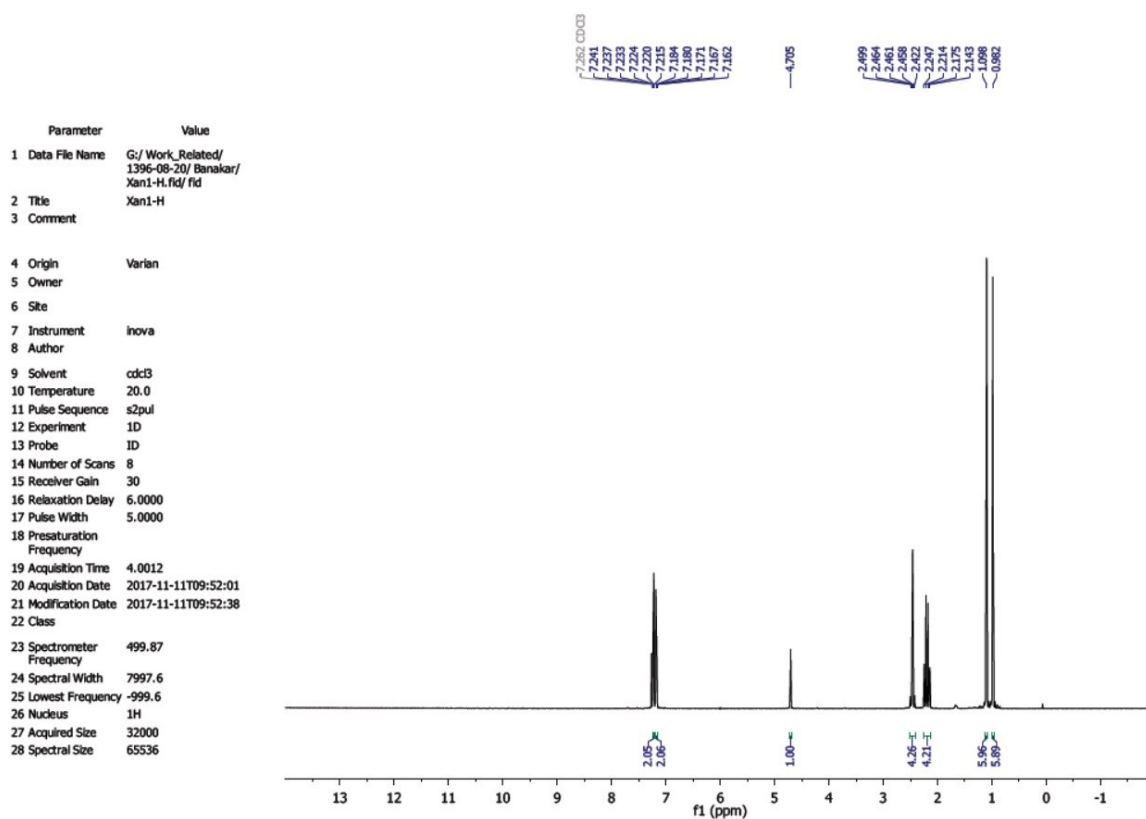

**Fig. 11** <sup>1</sup>H NMR spectrum of 9-(4-chlorophenyl)-3,3,6,6-tetramethyl-3,4,5,6,7,9-hexahydro-1H-xanthene-1,8(2H)-dione (**5a**).

**3,3,6,6-tetramethyl-9-(*p*-tolyl)-3,4,5,6,7,9-hexahydro-1*H*-xanthene-1,8(2*H*)-dione (5j)**

White solid; m.p. 225°C (recrystallized from EtOH); IR  $\tilde{\nu}$ : 2958, 1662, 1623, 1365, 1195, 1162, 1136, 1000, 844, 567, 532  $\text{cm}^{-1}$ ;  $^1\text{H}$  NMR (500 MHz,  $\text{CDCl}_3$ )  $\delta$  (ppm): 7.18 (2H, d,  $J=8$  Hz, ArH), 7.00 (2H, d,  $J=8$  Hz, ArH), 4.70 (1H, s, CH), 2.45 (4H, s,  $\text{CH}_2$ ), 2.24-2.14 (4H, m,  $\text{CH}_2$ ), 1.09 (6H, s,  $\text{CH}_3$ ), 0.99 (6H, s,  $\text{CH}_3$ ).

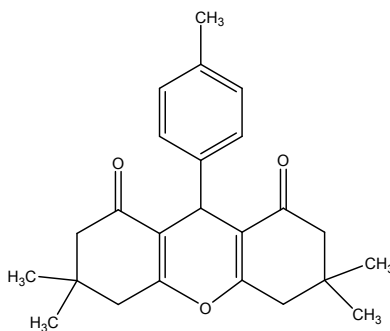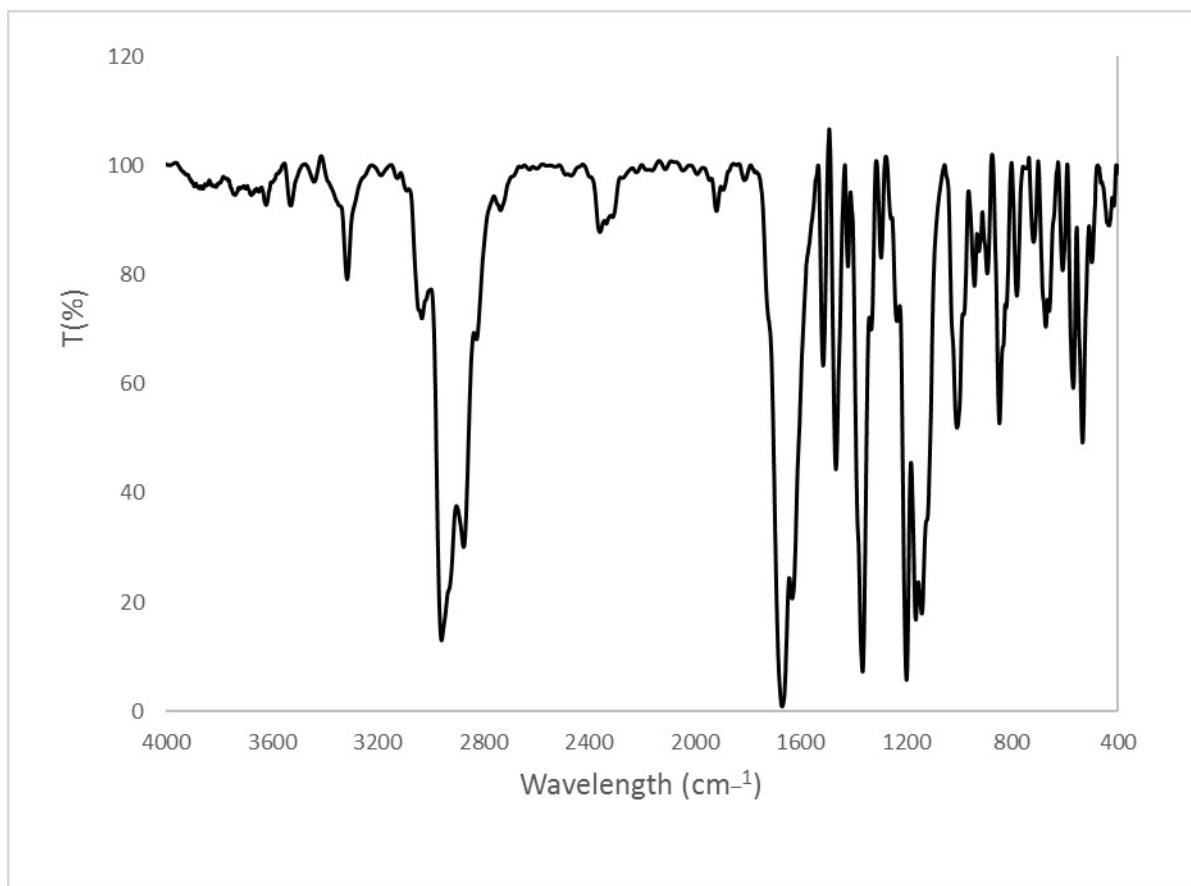

**Fig. 12** IR spectrum of 3,3,6,6-tetramethyl-9-(*p*-tolyl)-3,4,5,6,7,9-hexahydro-1*H*-xanthene-1,8(2*H*)-dione (**5j**).

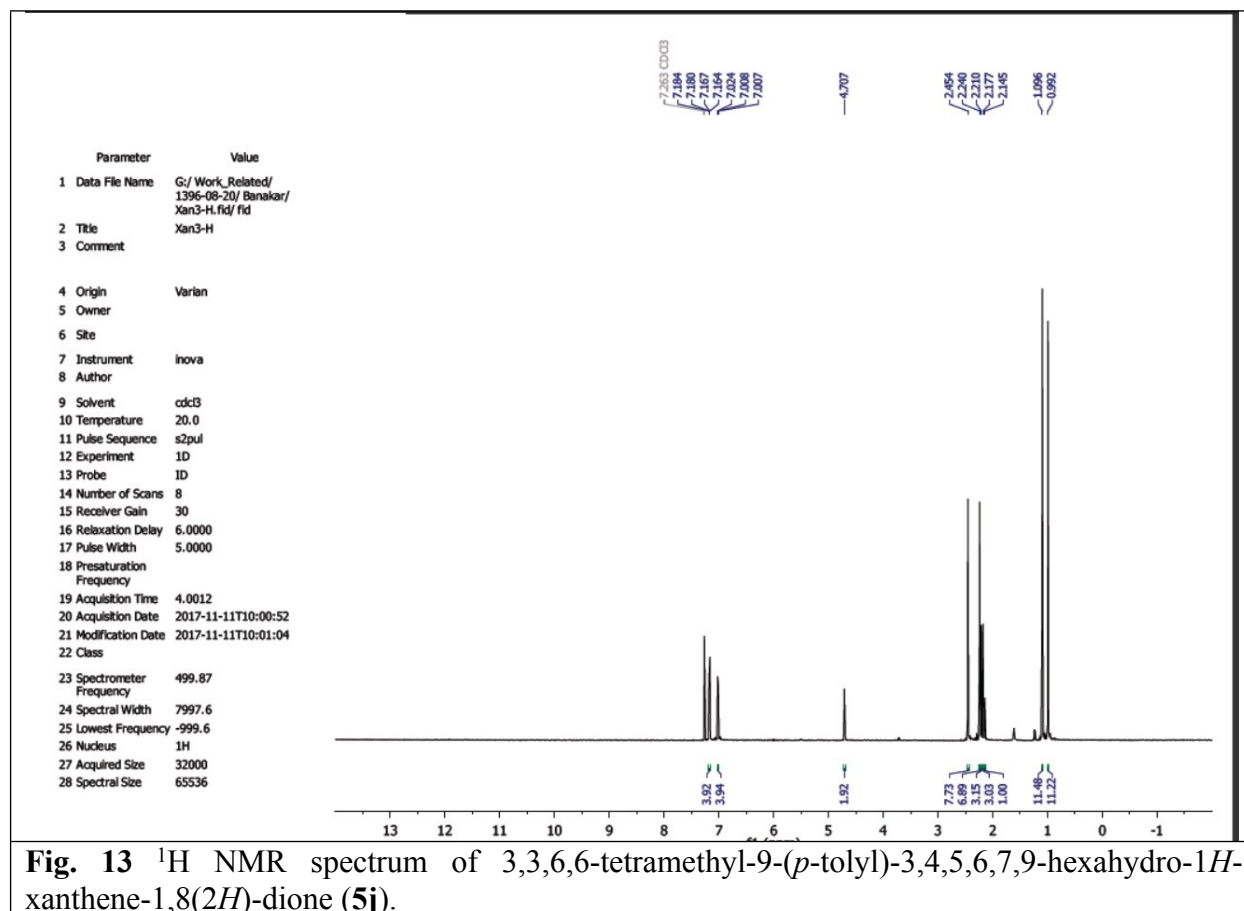

**Fig. 13** <sup>1</sup>H NMR spectrum of 3,3,6,6-tetramethyl-9-(*p*-tolyl)-3,4,5,6,7,9-hexahydro-1*H*-xanthene-1,8(2*H*)-dione (**5j**).
